# Supplementary material
Source: PubMed Central journal article supplement (PMC6726428)
Supplement: NIHMS1532491-supplement-3.pdf [file NIHMS1532491-supplement-3.pdf]

Supplementary Figure S2

MSI (hypermutated)

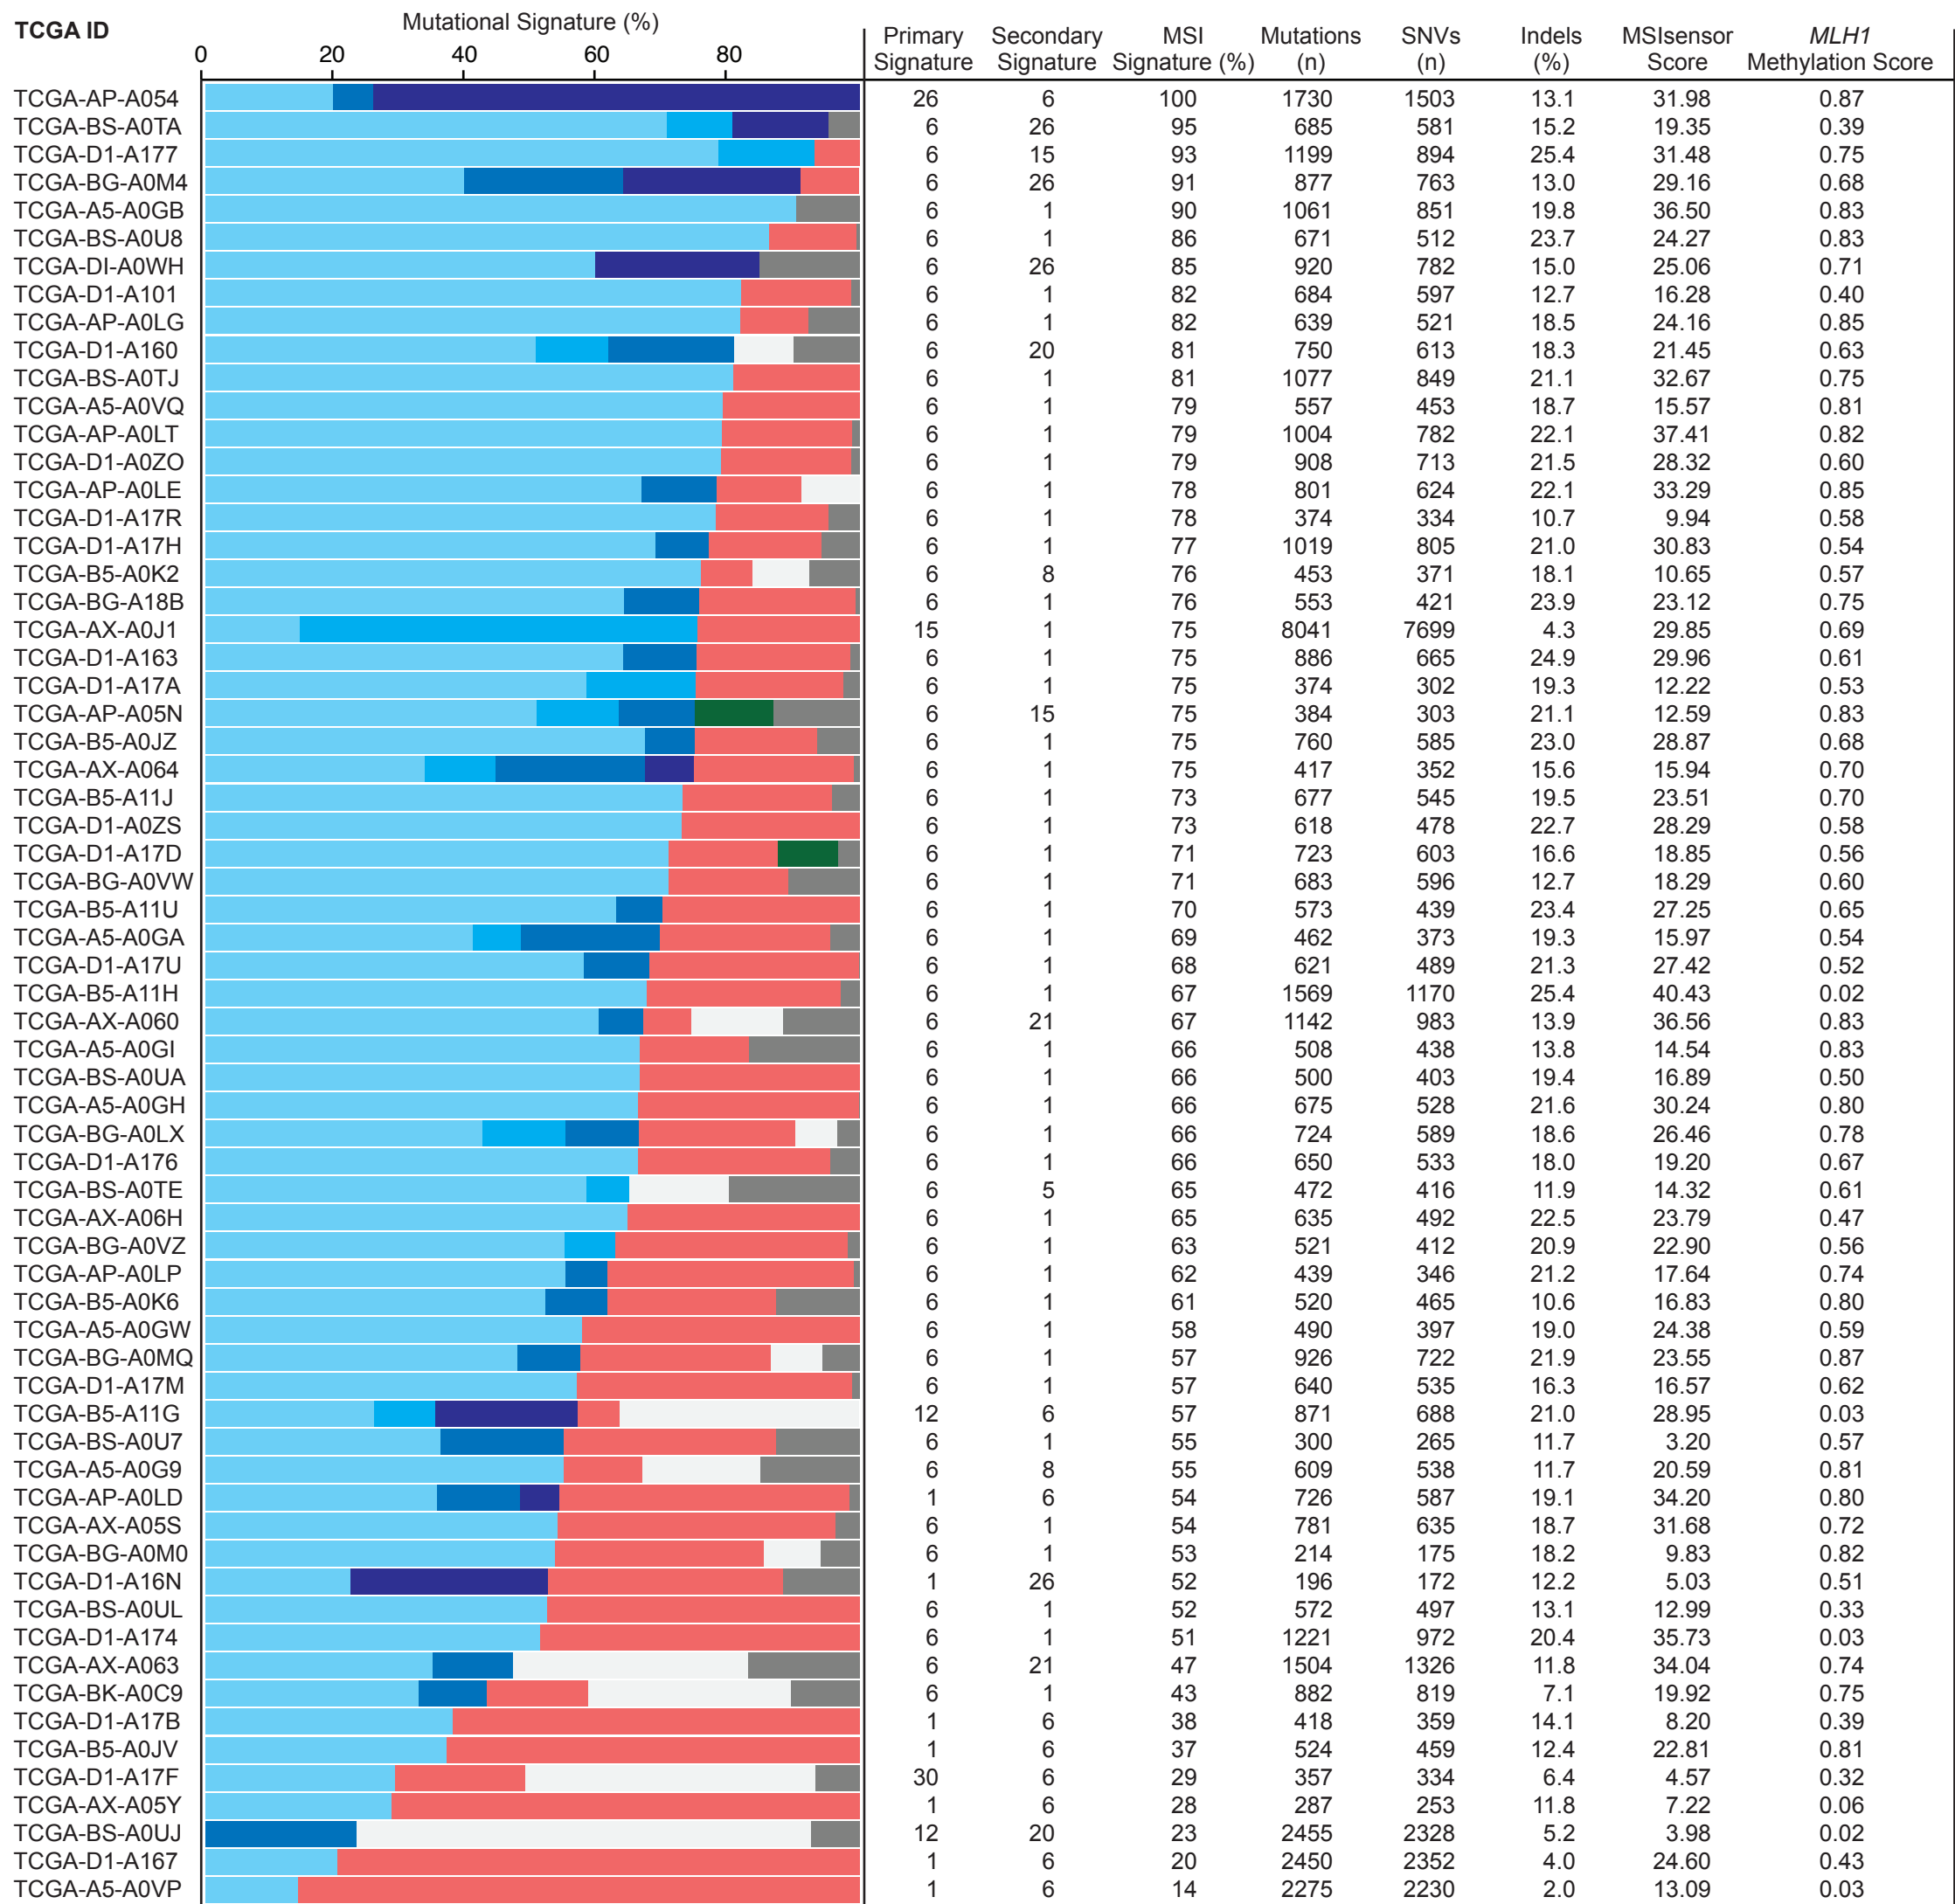

Signatures: POLE (10, 14), MMR defect (6, 15, 20, 26), Aging (1), HRD defect (3), Other (Other, NA)
