# Supplementary material
Source: PubMed Central journal article supplement (PMC6726428)
Supplement: NIHMS1532491-supplement-7.pdf [file NIHMS1532491-supplement-7.pdf]

## SUPPLEMENTARY METHODS

### Whole-exome sequencing analysis of primary and matched metastatic ECs

Whole-exome sequencing (WES) data in form of Binary Sequence Alignment Map format (BAM) files from primary ECs and matched metastatic lesions from 26 EC patients described by Gibson *et al.* [1] were downloaded from dbGaP with accession phs001127.v1.p1. The SRA formatted files were converted to standard FASTQ by means of a fastq-dump program as part of the SRA toolkit [2]. FASTQ files were then mapped onto the reference human genome GRCh37 using the Burrows-Wheeler Aligner (BWA, v0.7.15) [3], and sequencing data analysis performed as previously described [4]. Local realignment, duplicate removal and base quality score recalibration was performed using the Genome Analysis Toolkit (GATK, v3.1.1) [5]. Somatic single nucleotide variants (SNVs) were identified using MuTect (v1.0) [6], small insertions and deletions (indels) using Strelka (v2.0.15) [7], VarScan2 (v2.3.7) [8], Lancet (v1.0.0) [9] and Scalpel (v0.5.3) [10], and further curated by manual inspection. SNVs and indels outside of the target regions were filtered out, as were SNVs and indels for which the variant allele fraction (VAF) in the tumor sample was <5 times that of the paired normal VAF, and SNVs and indels found at >5% global minor allele frequency of dbSNP (build 137), as previously described [4]. In addition to the SNV and indel identification described above, mutations that were identified in the primary or metastatic tumor sample from a given patient were subsequently interrogated in the matched respective primary or metastatic sample by manual inspection of BAM files using mpileup files generated from SAMtools mpileup (version 1.2 htslib 1.2.1)[11]. Only somatic mutations with a depth  $\geq 20$  reads in the respective normal samples were considered. Somatic copy number alterations and loss of heterozygosity (LOH) were obtained using FACETS [12], as previously described [4]. The cancer cell fractions (CCFs) of all mutations were computed using ABSOLUTE (v1.0.6)[13], as previously described [4]. A combination of mutation function predictors was employed to define the potential functional impact of each missense SNV, as previously described [14]. Mutational hotspots were assigned according to Chang *et al.* [15].

**SUPPLEMENTARY REFERENCES**

- [1] Gibson WJ, Hoivik EA, Halle MK, Taylor-Weiner A, Cherniack AD, Berg A, et al. The genomic landscape and evolution of endometrial carcinoma progression and abdominopelvic metastasis. *Nat Genet.* 48 (2016) 848-855.
- [2] Leinonen R, Sugawara H, Shumway M, International Nucleotide Sequence Database C. The sequence read archive. *Nucleic Acids Res.* 39 (2011) D19-21.
- [3] Li H, Durbin R. Fast and accurate short read alignment with Burrows-Wheeler transform. *Bioinformatics.* 25 (2009) 1754-1760.
- [4] Weigelt B, Bi R, Kumar R, Blecua P, Mandelker DL, Geyer FC, et al. The Landscape of Somatic Genetic Alterations in Breast Cancers From ATM Germline Mutation Carriers. *J Natl Cancer Inst.* 110 (2018) 1030-1034.
- [5] McKenna A, Hanna M, Banks E, Sivachenko A, Cibulskis K, Kernytsky A, et al. The Genome Analysis Toolkit: a MapReduce framework for analyzing next-generation DNA sequencing data. *Genome Res.* 20 (2010) 1297-1303.
- [6] Cibulskis K, Lawrence MS, Carter SL, Sivachenko A, Jaffe D, Sougnez C, et al. Sensitive detection of somatic point mutations in impure and heterogeneous cancer samples. *Nat Biotechnol.* 31 (2013) 213-219.
- [7] Saunders CT, Wong WS, Swamy S, Becq J, Murray LJ, Cheetham RK. Strelka: accurate somatic small-variant calling from sequenced tumor-normal sample pairs. *Bioinformatics.* 28 (2012) 1811-1817.
- [8] Koboldt DC, Zhang Q, Larson DE, Shen D, McLellan MD, Lin L, et al. VarScan 2: somatic mutation and copy number alteration discovery in cancer by exome sequencing. *Genome Res.* 22 (2012) 568-576.
- [9] Narzisi G, Corvelo A, Arora K, Bergmann EA, Shah M, Musunuri R, et al. Genome-wide somatic variant calling using localized colored de Bruijn graphs. *Comms Bio.* 1 (2018) 1-9.
- [10] Narzisi G, O'Rawe JA, Iossifov I, Fang H, Lee YH, Wang Z, et al. Accurate de novo and transmitted indel detection in exome-capture data using microassembly. *Nat Methods.* 11 (2014) 1033-1036.
- [11] Li H, Handsaker B, Wysoker A, Fennell T, Ruan J, Homer N, et al. The Sequence Alignment/Map format and SAMtools. *Bioinformatics.* 25 (2009) 2078-2079.
- [12] Shen R, Seshan VE. FACETS: allele-specific copy number and clonal heterogeneity analysis tool for high-throughput DNA sequencing. *Nucleic Acids Res.* 44 (2016) e131.
- [13] Carter SL, Cibulskis K, Helman E, McKenna A, Shen H, Zack T, et al. Absolute quantification of somatic DNA alterations in human cancer. *Nat Biotechnol.* 30 (2012) 413-421.

- [14] Martelotto LG, Ng CK, De Filippo MR, Zhang Y, Piscuoglio S, Lim RS, et al. Benchmarking mutation effect prediction algorithms using functionally validated cancer-related missense mutations. *Genome Biol.* 15 (2014) 484.
- [15] Chang MT, Asthana S, Gao SP, Lee BH, Chapman JS, Kandoth C, et al. Identifying recurrent mutations in cancer reveals widespread lineage diversity and mutational specificity. *Nat Biotechnol.* 34 (2016) 155-163.
