# Supplementary material
Source: PubMed Central journal article supplement (PMC6726428)

# Supplementary Figure S1

**A**

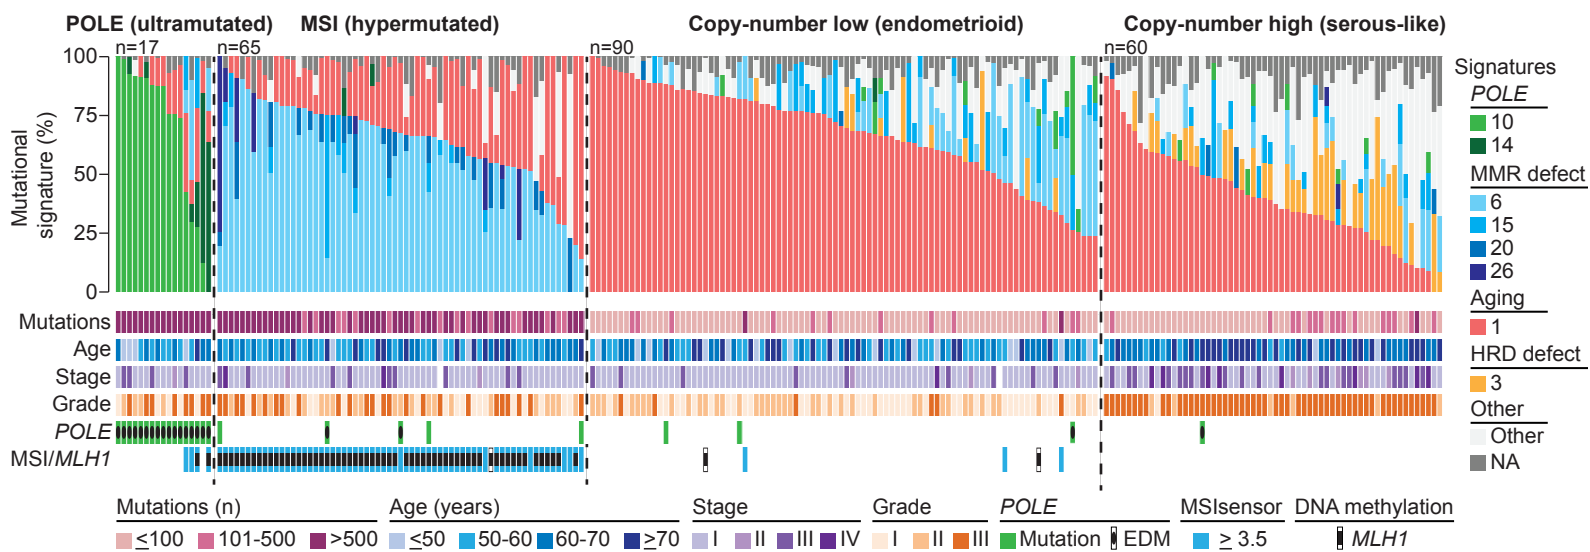

**B**

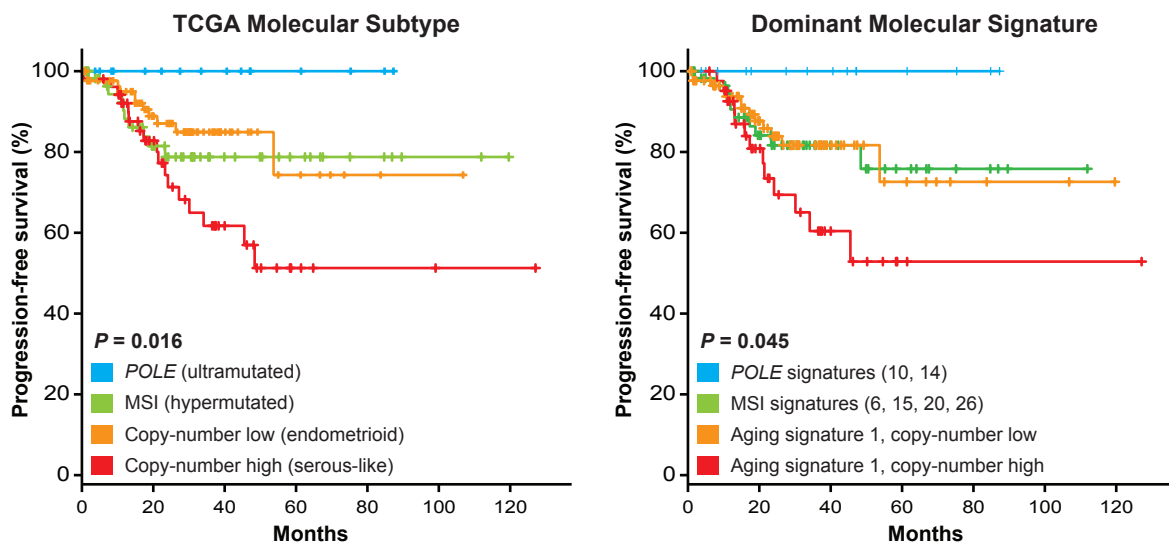

Supplement: NIHMS1532491-supplement-2.pdf [file NIHMS1532491-supplement-2.pdf]

# Supplementary Figure S4

**A**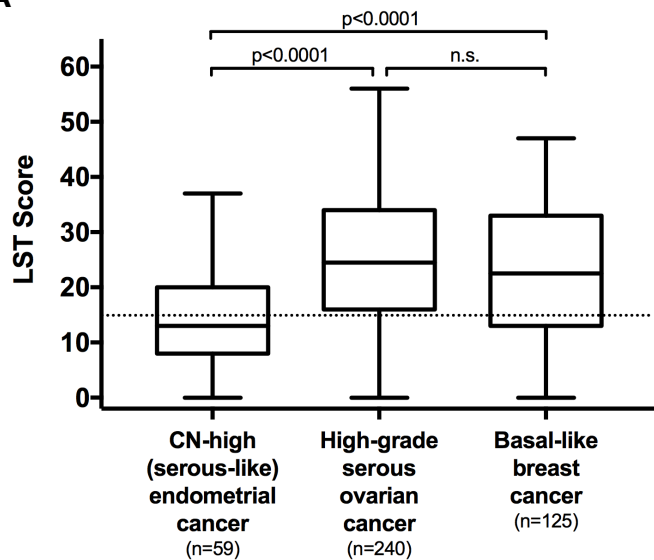**B**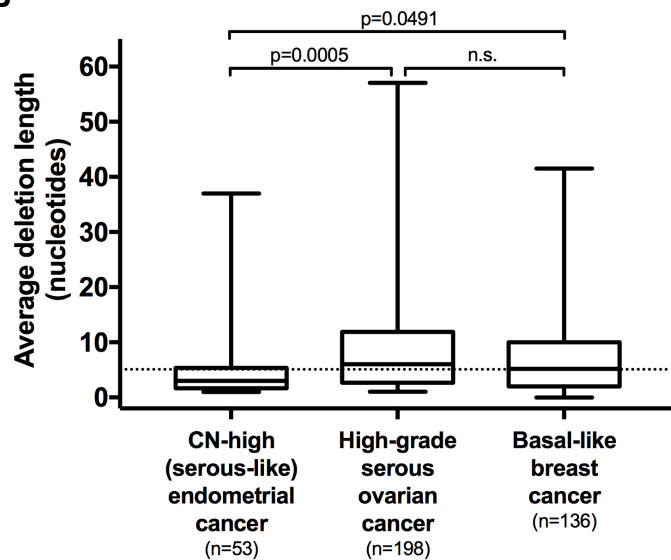**C**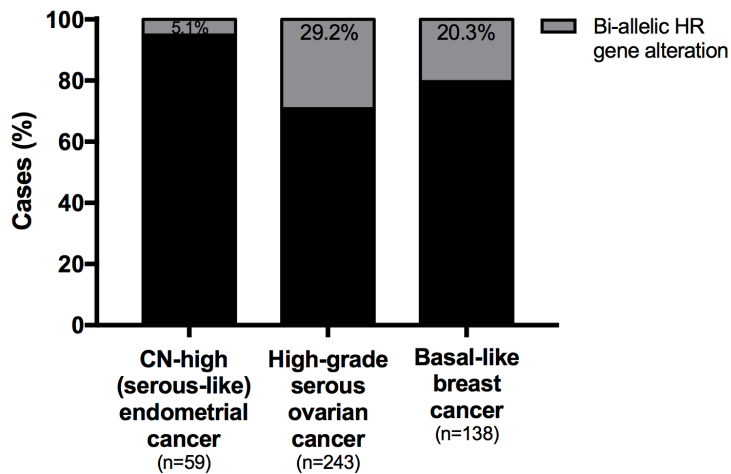

Supplement: NIHMS1532491-supplement-5.pdf [file NIHMS1532491-supplement-5.pdf]

Supplementary Figure S5

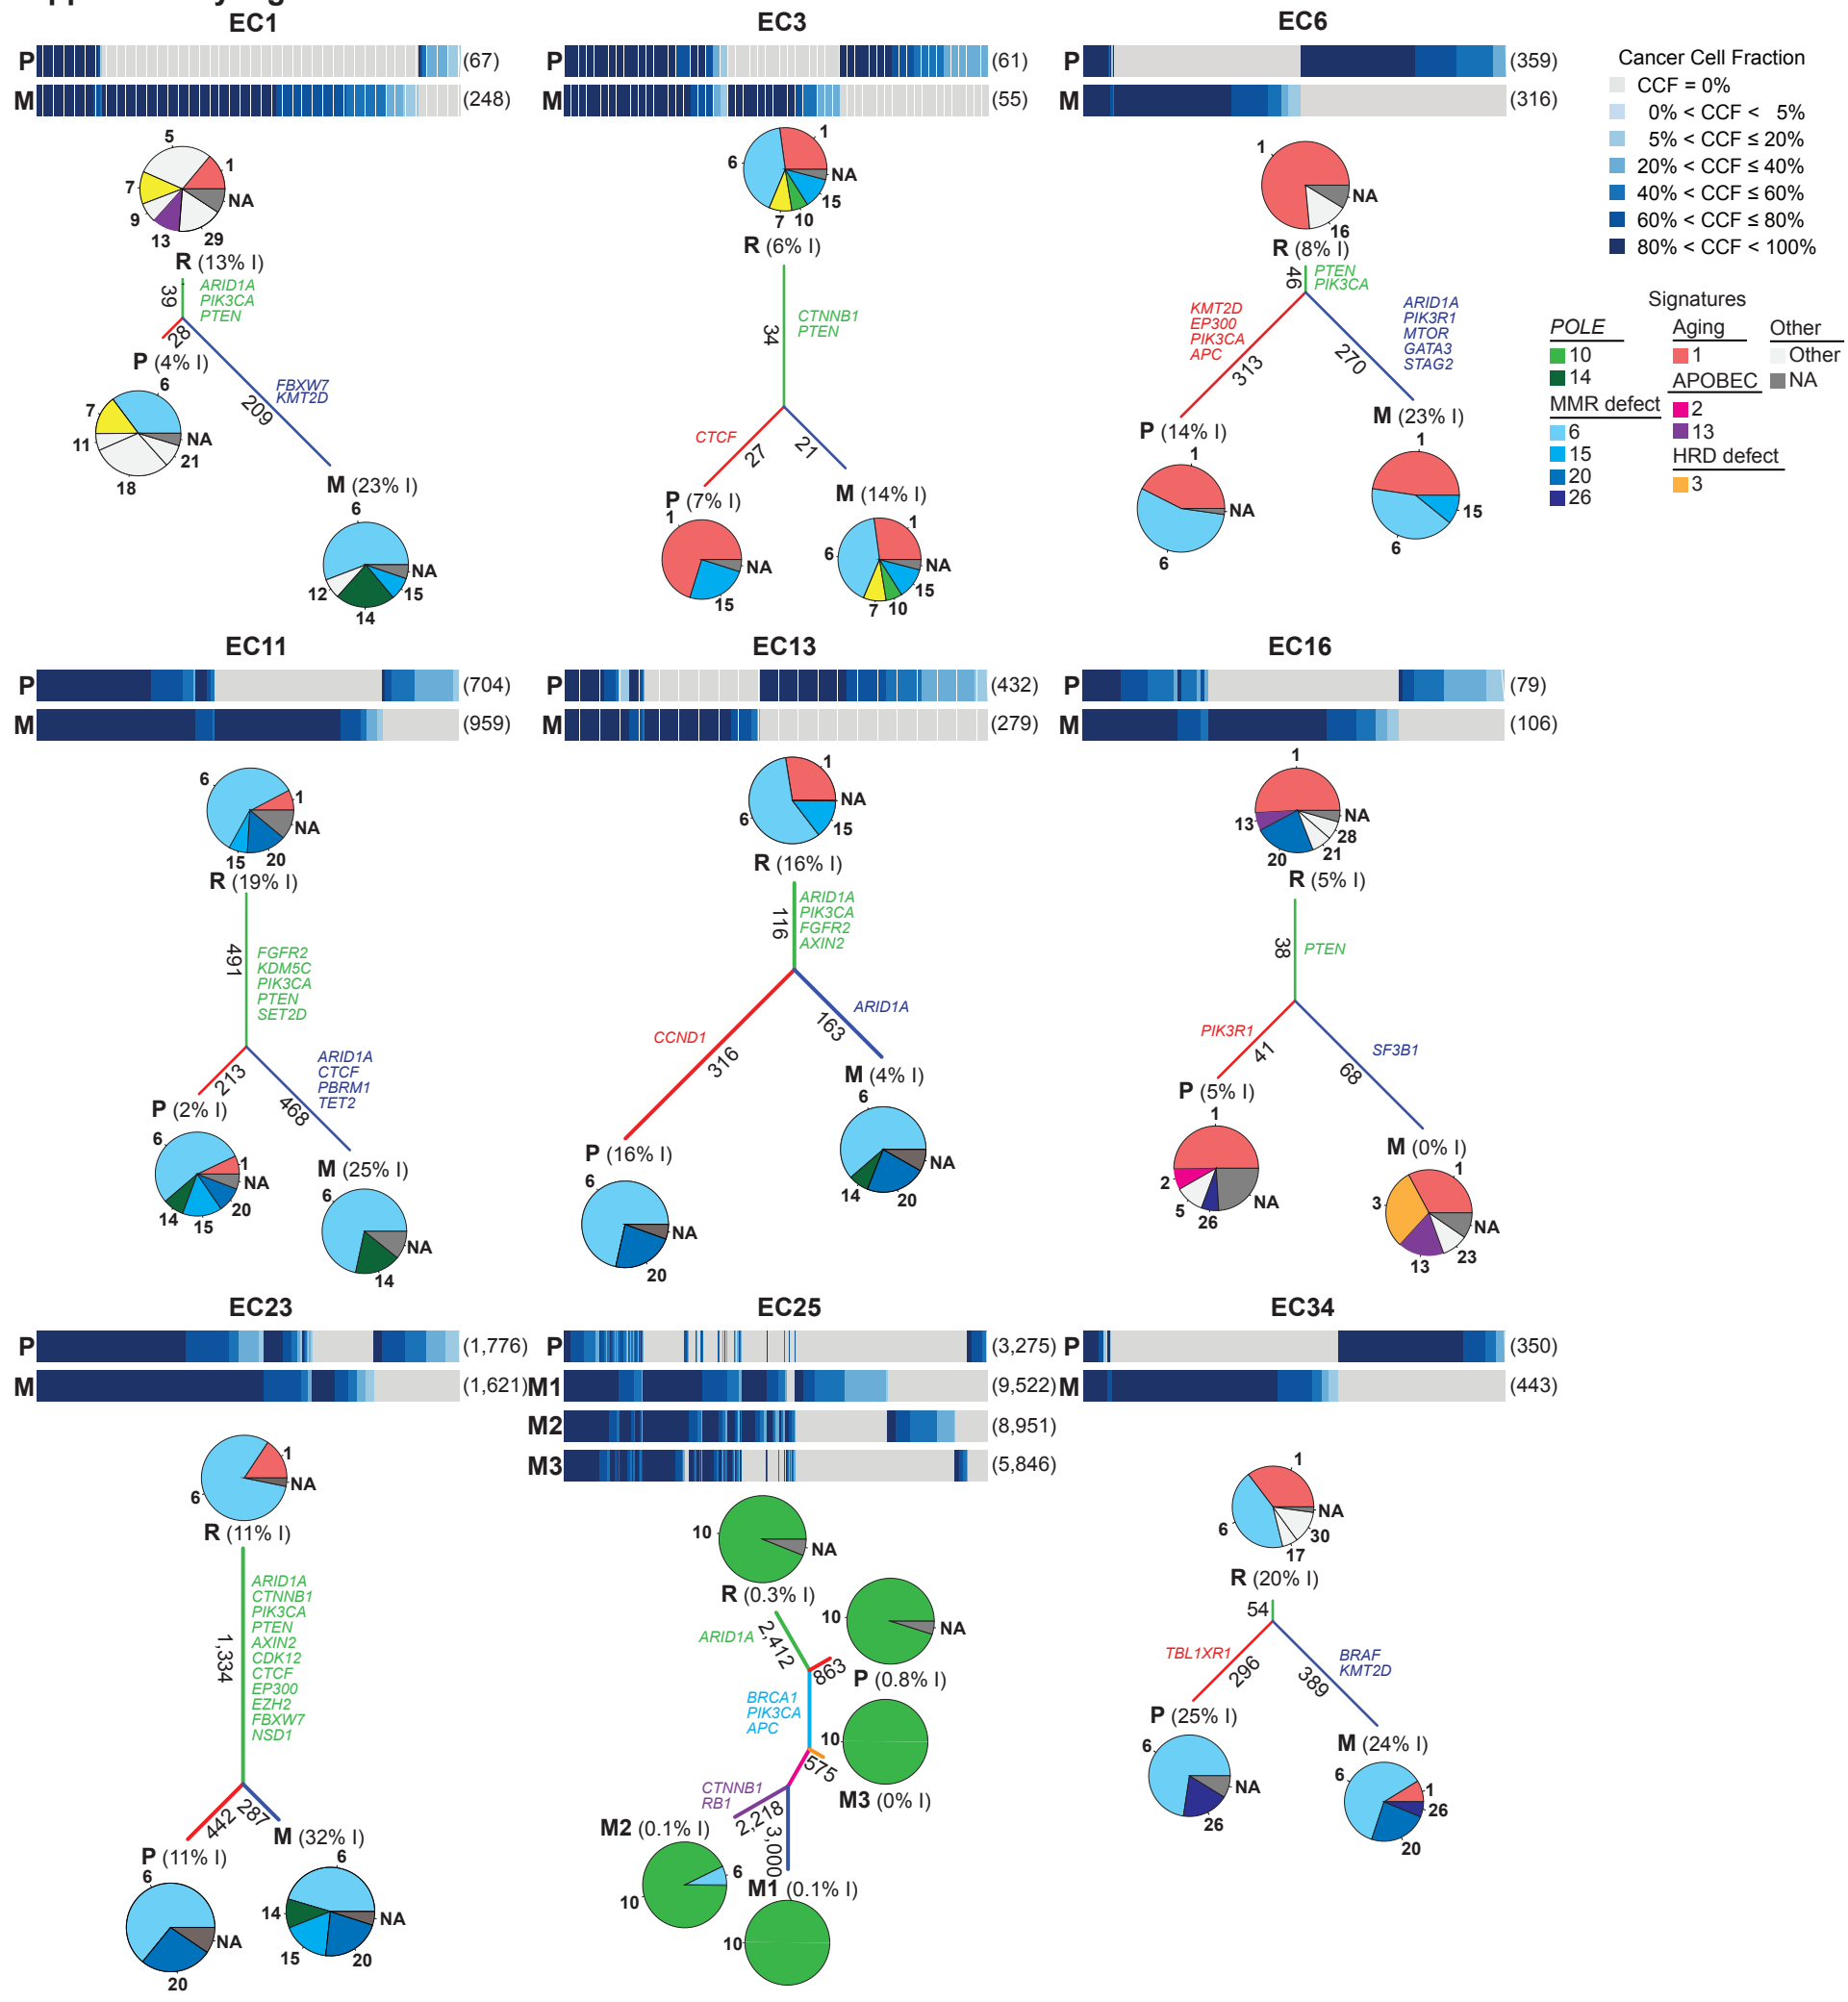

Supplement: NIHMS1532491-supplement-6.pdf [file NIHMS1532491-supplement-6.pdf]
